# Supplementary figures and images for: Post-processing sets of tilted CT volumes as a method for metal artifact reduction
Source: Springer Nature journal article supplement (doi:10.1186/1748-717x-9-114), 2014-05-15

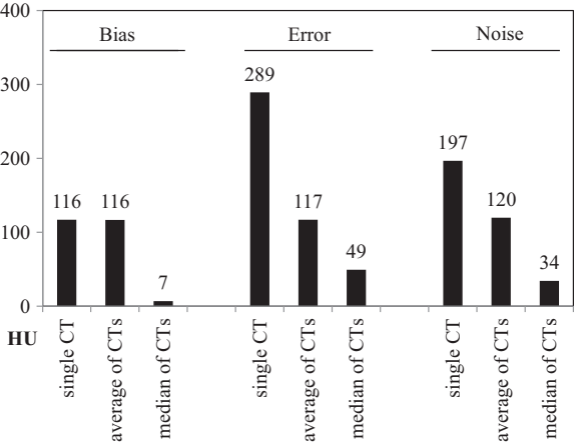

Supplement: 13014_2013_1113_MOESM6_ESM.pdf [file 13014_2013_1113_MOESM6_ESM.pdf]
